# Supplementary material for: Analytical approach for predicting fresh water discharge in an estuary based on tidal water level observations
Source: Copernicus journal article supplement (doi:10.5194/hess-18-4153-2014), 2014-10-17
Supplement: Supplementary file 1 [file hess-18-4153-2014-supplement.zip]

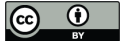

## *Supplement of*

# **Analytical approach for predicting fresh water discharge in an estuary based on tidal water level observations**

**H. Cai et al.**

*Correspondence to:* H. Cai ([h.cai@tudelft.nl](mailto:h.cai@tudelft.nl))

- Supplement-Cover-Letter.pdf
- Matlab\_scripts
  - Forward model
    - \* Example\_forward\_model.m
    - \* f\_new\_2012.m
    - \* f\_toffolon\_2011.m
    - \* findzero\_new\_discharge\_river.m
    - \* findzero\_new\_discharge\_tide.m
    - \* newtonm.m
  - Inverse model
    - \* Example\_inverse\_model.m
  - readme.txt
